# Supplementary material for: Synthesis, Covalency Sequence, and Crystal Features of Pentagonal Uranyl Acylpyrazolone Complexes along with DFT Calculation and Hirshfeld Analysis
Source: PubMed Central journal article supplement — ACS Omega. 2022 Sep 16;7(38):34359–69. doi: 10.1021/acsomega.2c03923 (PMC9520728; doi:10.1021/acsomega.2c03923), 2022-09-16
Supplement: ao2c03923_si_001.pdf [file ao2c03923_si_001.pdf]

# Synthesis, Covalency Sequence and Crystal features of Pentagonal Uranyl Acylpyrazolone complexes along with DFT calculation and Hirshfeld analysis

Maitrey Travadi<sup>a</sup>, Rajendrasinh N. Jadeja<sup>a\*</sup>, Ray J. Butcher<sup>b</sup>

<sup>a</sup> Department of Chemistry, Faculty of Science, The Maharaja Sayajirao University of Baroda, Vadodara 390002, India

<sup>b</sup> Department of Inorganic & Structural Chemistry, Howard University, Washington, DC, 22031, USA

Correspondence

Rajendrasinh N. Jadeja, Department of Chemistry,  
Faculty of Science,

The Maharaja Sayajirao University of Baroda,  
Vadodara 390002, India, Email: rjadeja-chem@msubaroda.ac.in

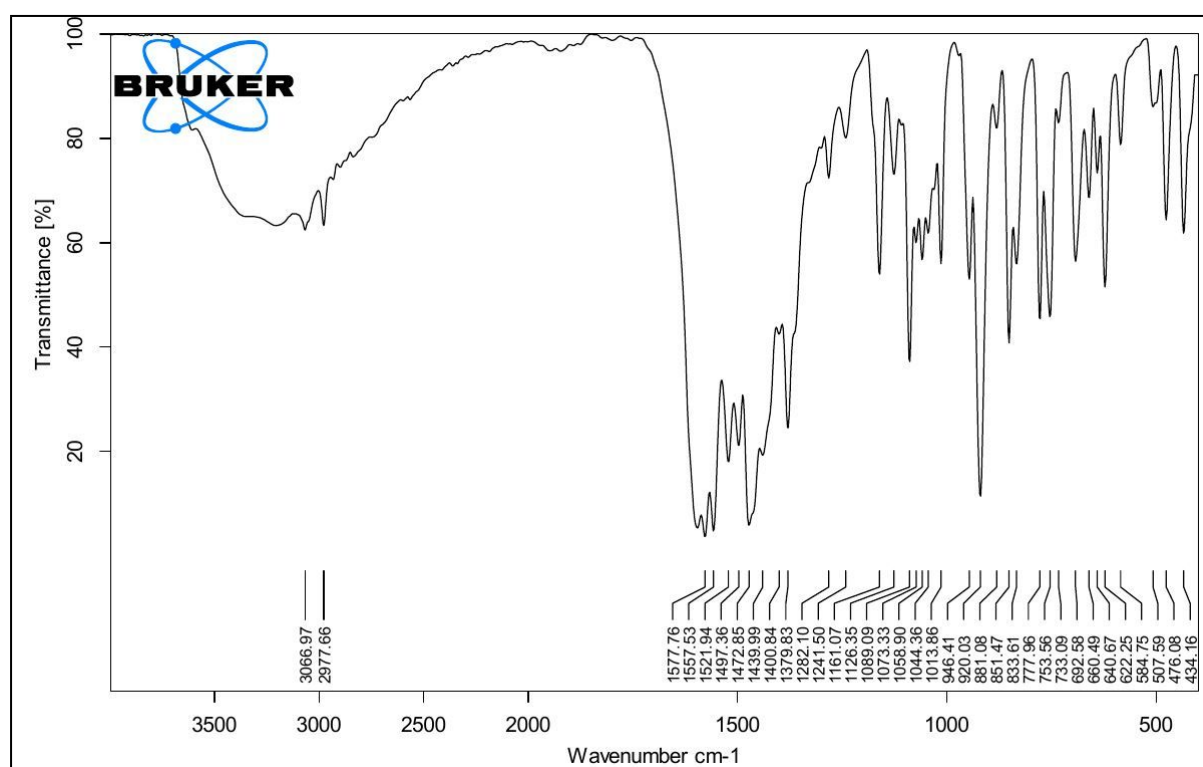

Figure S1 FTIR spectrum of complex I

## Supporting Information

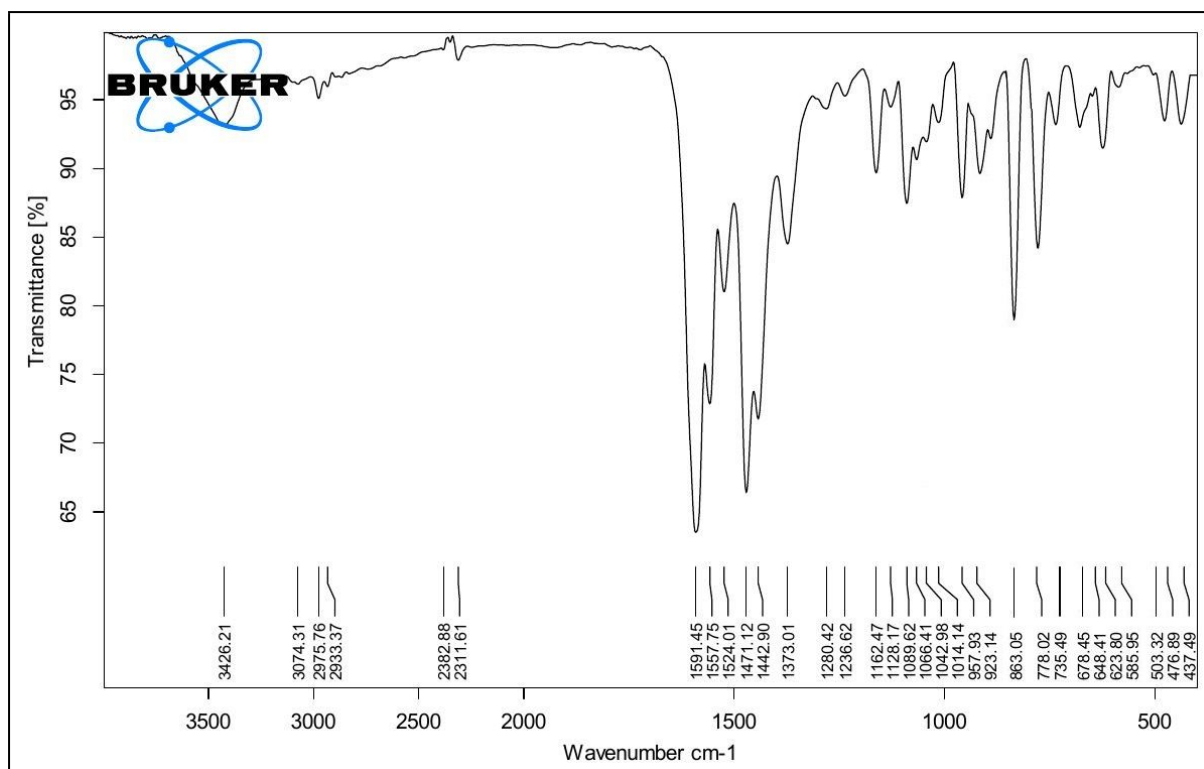

**Figure S2** FTIR spectrum of complex II

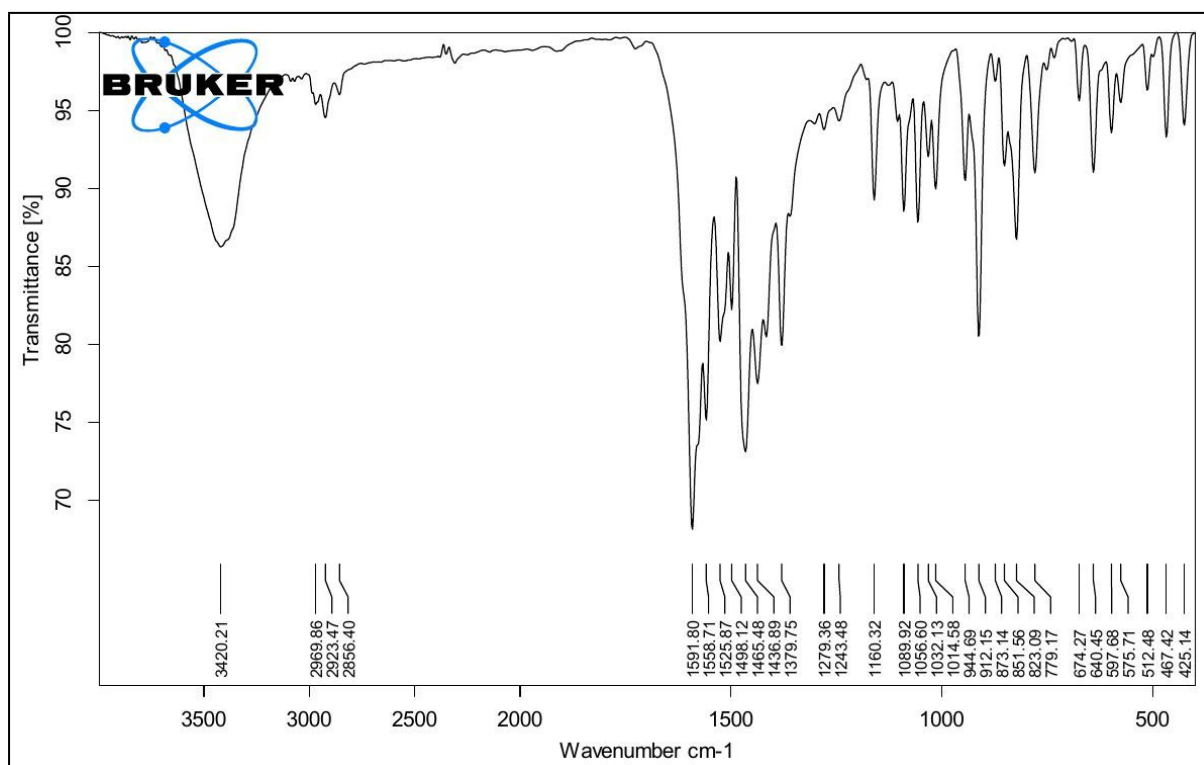

**Figure S3** FTIR spectrum of complex III

# Supporting Information

UL1 MAITREY 1H 26-08-2021  
 PROTON DMSO {D:\SRC} MSU-Chem 1

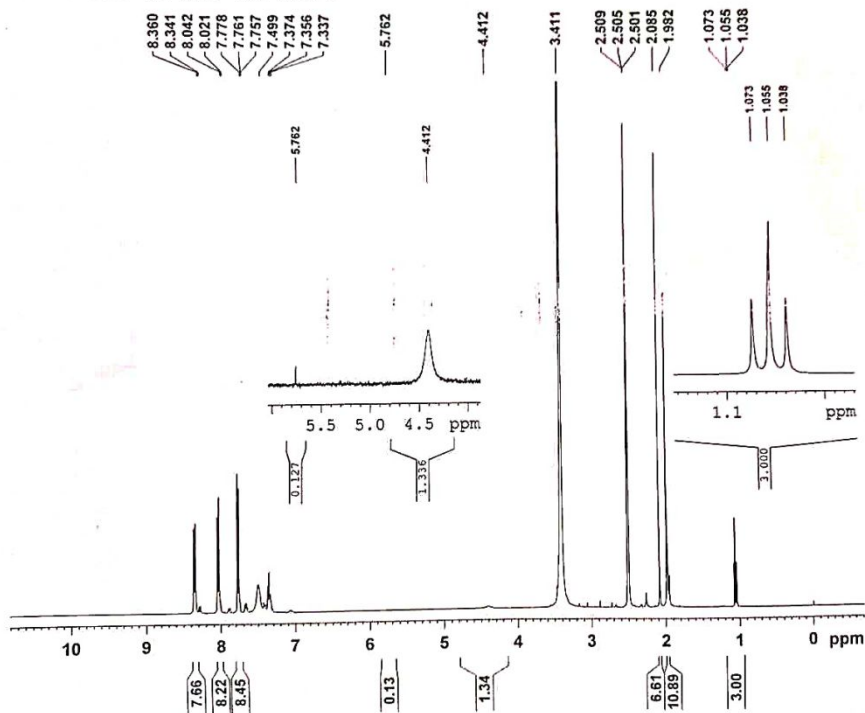

**Figure S4**  $^1\text{H-NMR}$  spectrum of complex I

UL2 MAITREY DMSO 1H 08-09-2021  
 PROTON DMSO {D:\ASD} MSU-Chem 1

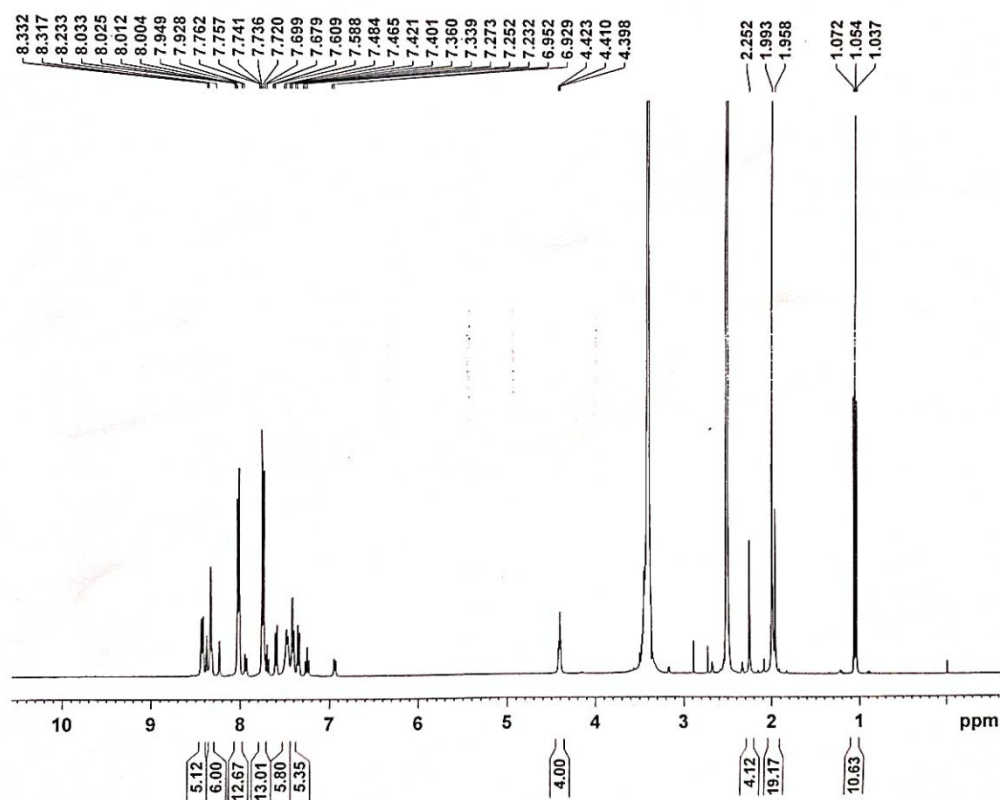

**Figure S5**  $^1\text{H-NMR}$  spectrum of complex II

# Supporting Information

UL3 MAITREY 9-12-2021  
 PROTON DMSO (D:\PJN) MSU-Chem 1

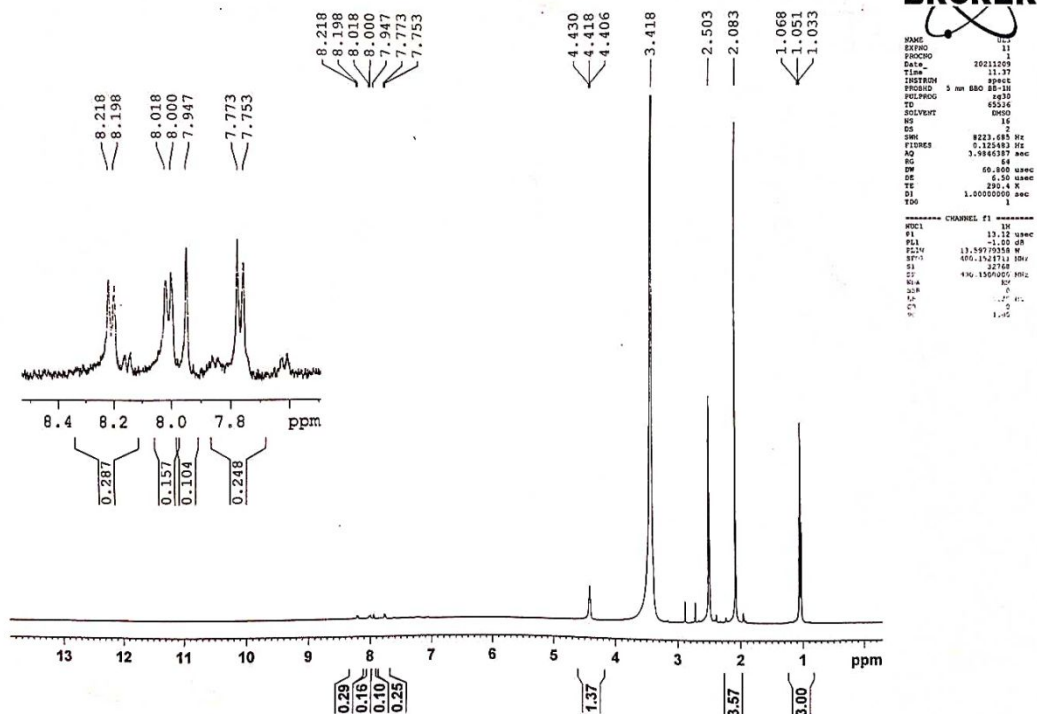

Figure S6 <sup>1</sup>H-NMR spectrum of complex III

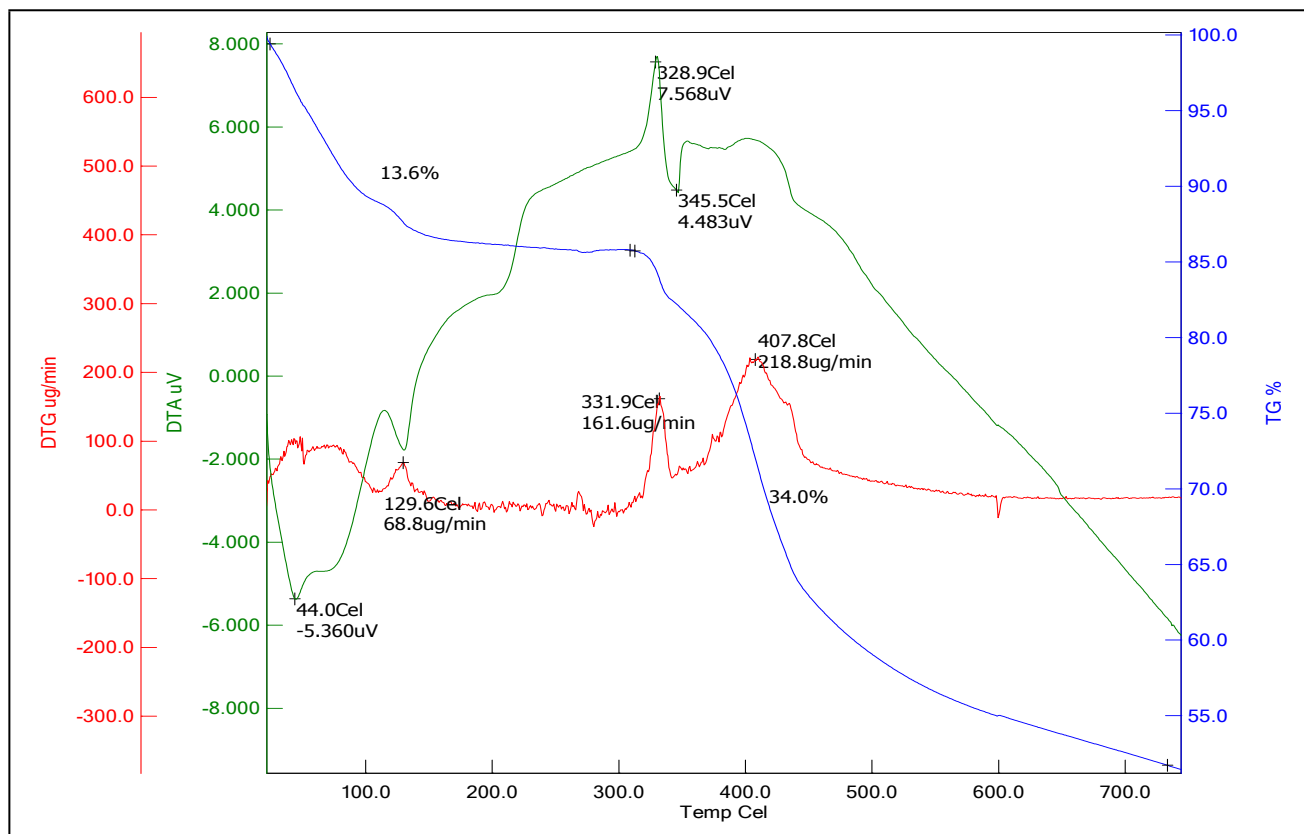

Figure S7 TG-DTA plot of complex I

## Supporting Information

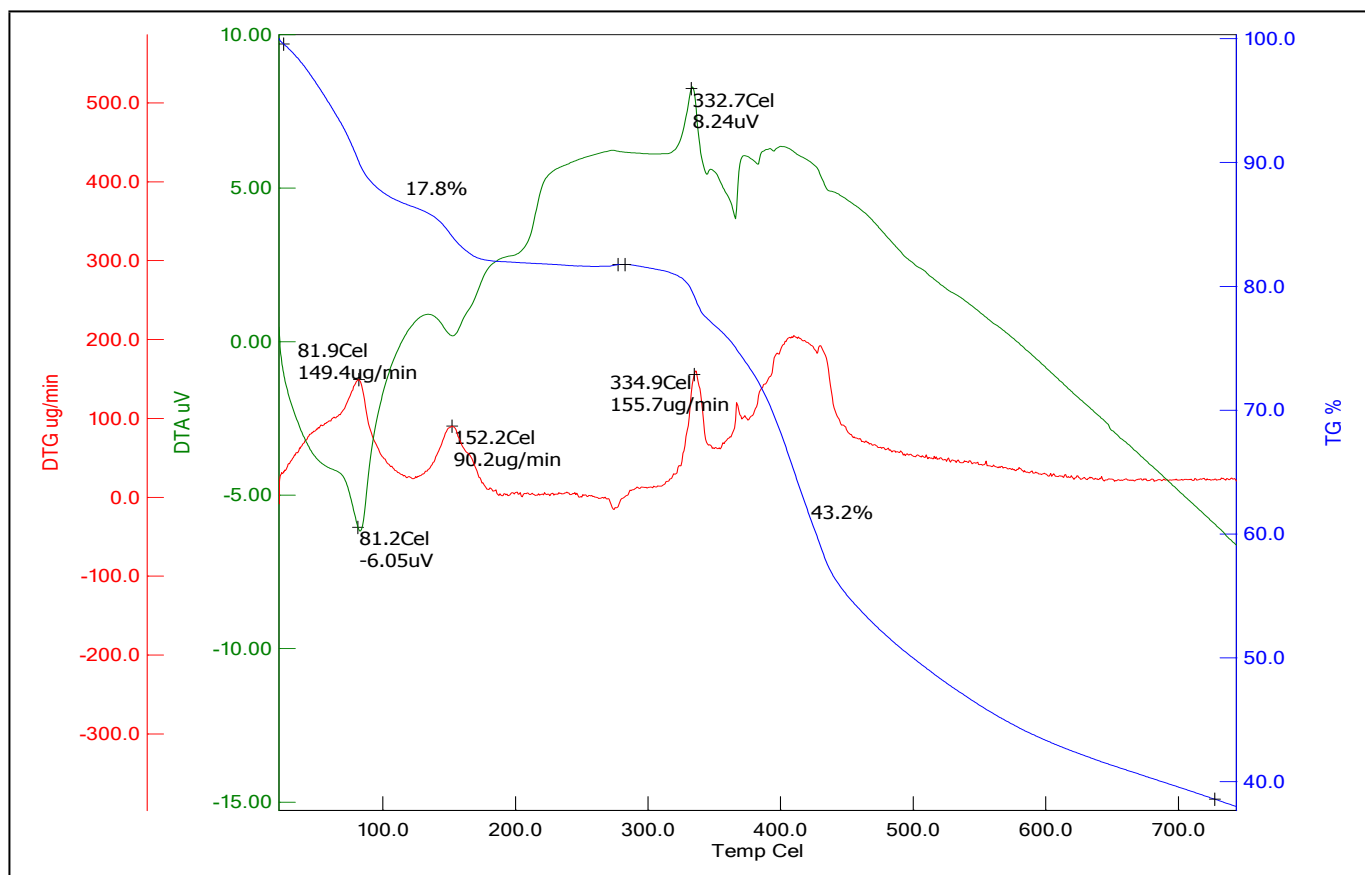

Figure S8 TG-DTA plot of complex II

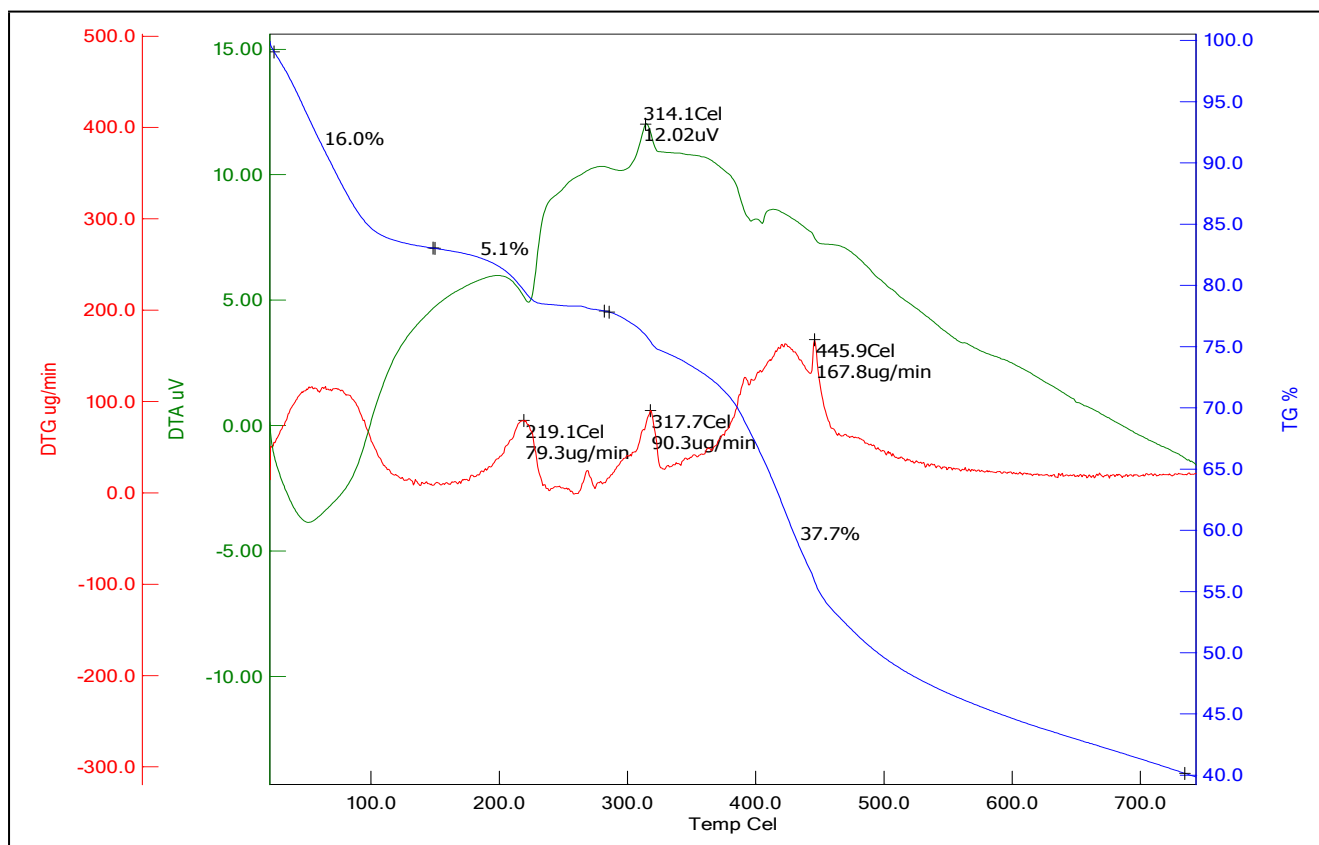

Figure S9 TG-DTA plot of complex III

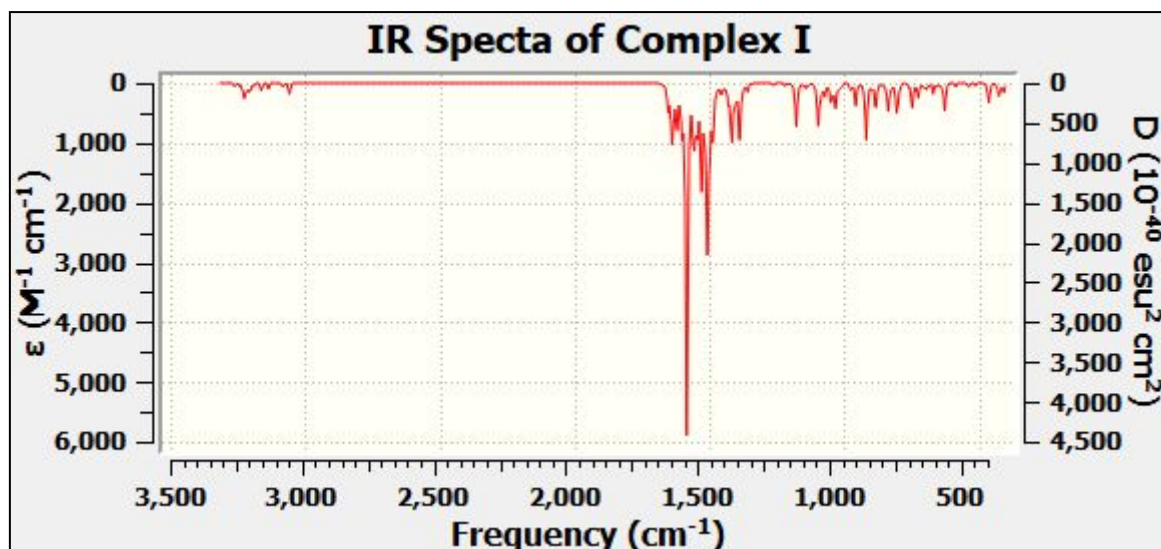

Figure S10 FTIR spectrum of complex I through computational analysis

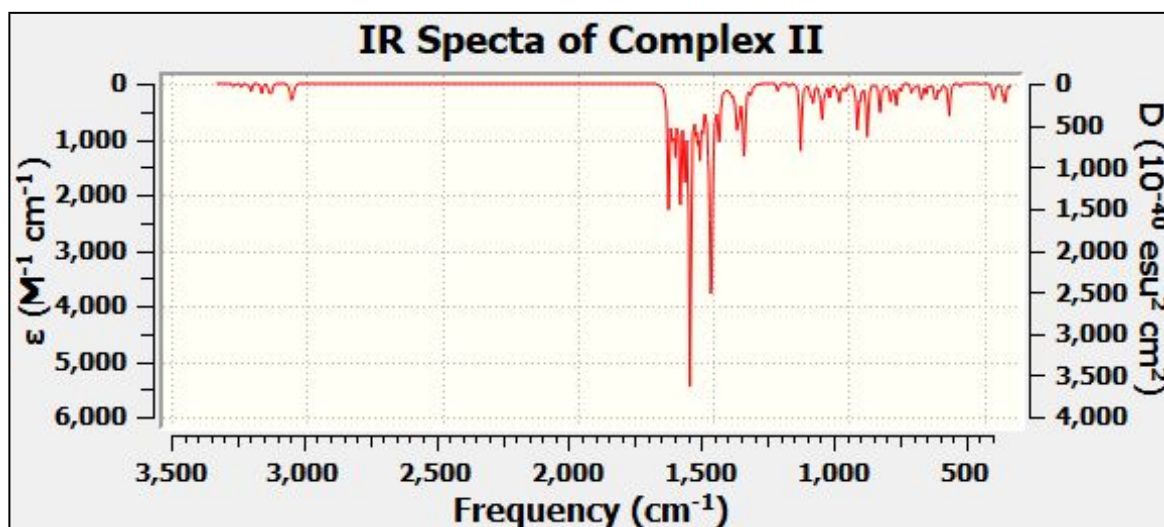

Figure S11 FTIR spectrum of complex II through computational analysis

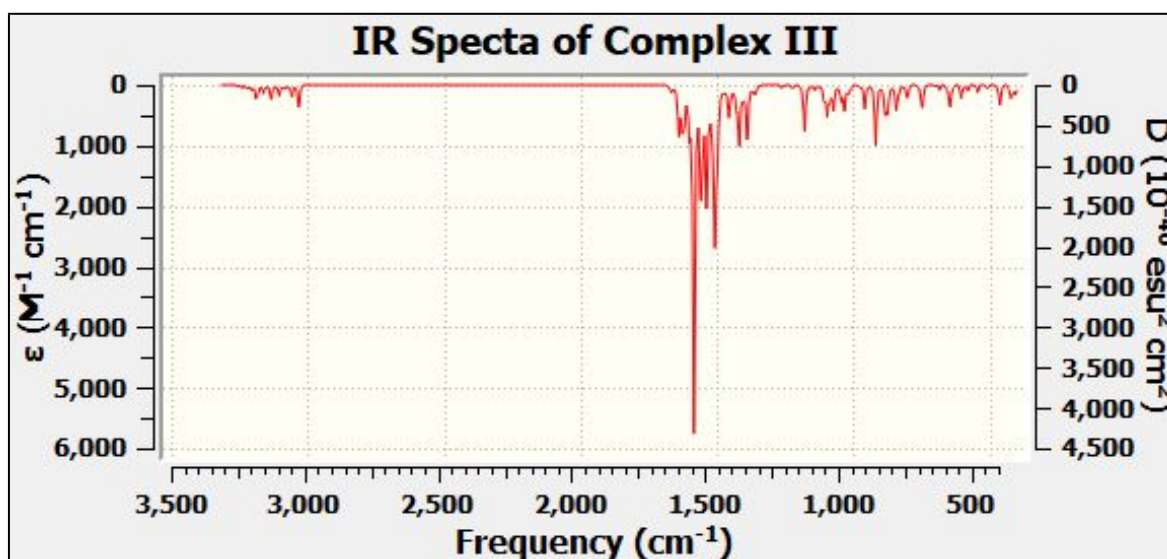

Figure S12 FTIR spectrum of complex III through computational analysis

## Supporting Information

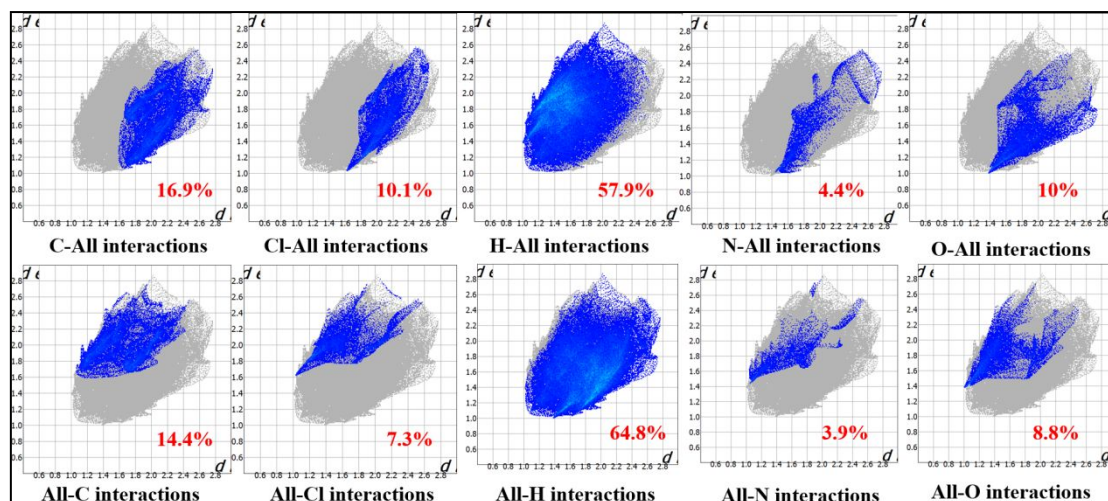

**Figure S13** Two dimensional fingerprint plots for atom-all and all-atom interactions in complex I

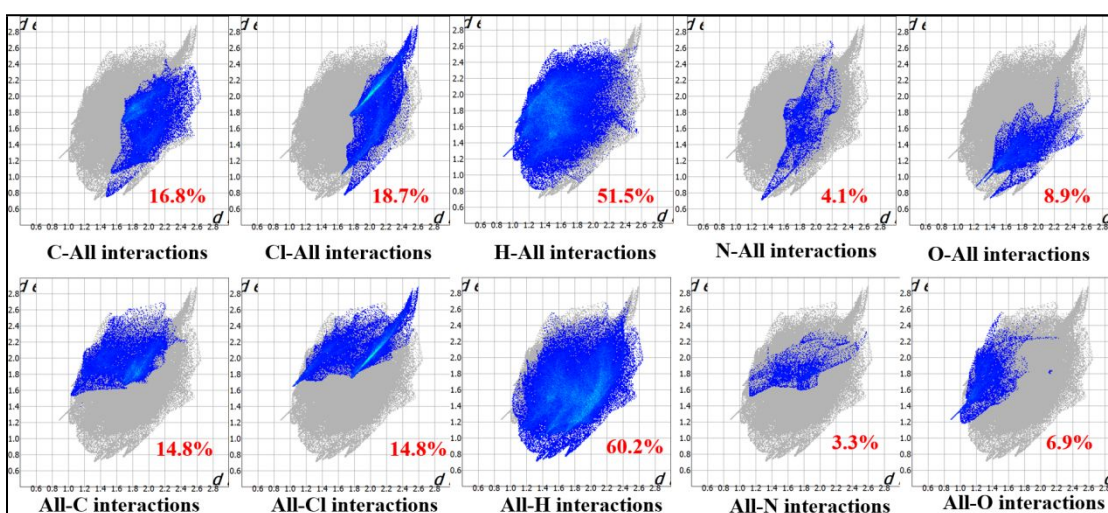

**Figure S14** Two dimensional fingerprint plots for atom-all and all-atom interactions in complex II

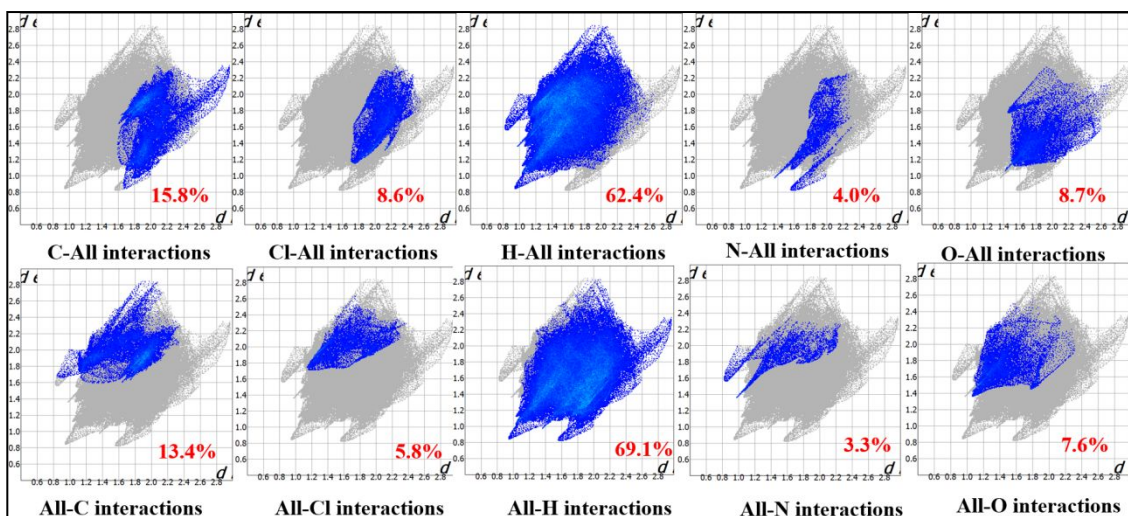

**Figure S15** Two dimensional fingerprint plots for atom-all and all-atom interactions in complex III
